# Supplementary material
Source: MDPI journal article supplement (https://www.mdpi.com/2076-3417/11/7/3281)
Supplement: s1 [file s1]

**Table S1:** ESI-07 intensities for the primary and secondary effects induced by the October 30, 2020, Mw=7.0, Samos earthquake and recorded in post-event field surveys of this study (source a), by Evelpidou et al. (2021) (source b) and Triantafyllou et al. (2021) (source c).

| PRIMARY EARTHQUAKE ENVIRONMENTAL EFFECTS |                                                                          |                               |                                                                                       |        |                                                  |                          |
|------------------------------------------|--------------------------------------------------------------------------|-------------------------------|---------------------------------------------------------------------------------------|--------|--------------------------------------------------|--------------------------|
| Fault Block affected by EEE              | Area affected by EEE                                                     | Type of EEE                   | Description of EEE                                                                    | Source | ESI-07 intensity                                 | Epicentral distance (km) |
| Karlovasi Basin                          | <b>Karlovassi vessel shelter</b> (northwestern part of Karlovasi basin)  | Permanent surface deformation | Coseismic uplift of 24 cm in Karlovassi vessel shelter                                | a      | IX                                               | 16.68                    |
| Karlovasi Basin                          | <b>Molos of Marathokampos</b> (southern part of Karlovasi basin)         | Permanent surface deformation | Coseismic uplift of 10 cm at a concrete jetty of Marathokampos port                   | a      | IX                                               | 24.39                    |
| Western Samos                            | <b>Akra promontory</b> (northwestern part of Western Samos fault block)  | Permanent surface deformation | Coseismic uplift of 20 cm at Akra promontory                                          | a, b   | IX                                               | 17.64                    |
| Western Samos                            | <b>Punta promontory</b> (northwestern part of Western Samos fault block) | Permanent surface deformation | Coseismic uplift of 20 cm at Akra promontory                                          | a, b   | IX                                               | 18.76                    |
| Western Samos                            | <b>Ayios Isidoros</b> (northwestern part of Western Samos fault block)   | Permanent surface deformation | Coseismic uplift of 30-35 cm at Ayios Isidoros coast                                  | a, b   | IX                                               | 25.77                    |
| Western Samos                            | <b>Megalo Seitani</b> (northwestern part of Western Samos fault block)   | Permanent surface deformation | Coseismic uplift of 22 cm at Megalo Seitani coast                                     | b      | IX                                               | 21.95                    |
| Karlovasi Basin                          | <b>Ayios Nikolaos</b> (northeastern part of Karlovasi Basin)             | Permanent surface deformation | Coseismic uplift of 15-20 cm due to the mainshock, 8-10 due to the January aftershock | a      | IX for the mainshock, VIII-IX for the aftershock | 12.51                    |

|                 |                                                                                        |                               |                                                                                          |   |                                                  |       |
|-----------------|----------------------------------------------------------------------------------------|-------------------------------|------------------------------------------------------------------------------------------|---|--------------------------------------------------|-------|
| Western Samos   | <b>Kampos of Marathokampos</b><br>(southern part of Western Samos fault block)         | Permanent surface deformation | Coseismic uplift of 15-20 cm due to the mainshock, 8-10 cm due to the January aftershock | a | IX for the mainshock, VIII-IX for the aftershock | 26.29 |
| Mytilinii Basin | <b>Kokkari</b><br>(northern part of Mytilinii basin)                                   | Permanent surface deformation | Coseismic uplift of 22 cm                                                                | b | IX                                               | 16.75 |
| Mytilinii Basin | <b>Potokaki beach</b><br>(southern part of Mytilinii basin)                            | Permanent surface deformation | Coseismic uplift of 25-30 cm                                                             | a | IX                                               | 27.27 |
| Eastern Samos   | <b>Asprochorti</b><br>(northwestern part of Eastern Samos fault block)                 | Permanent surface deformation | Coseismic uplift of 10 cm                                                                | a | IX                                               | 21.30 |
| Eastern Samos   | <b>Mourtia</b><br>(northeastern part of Eastern Samos fault block)                     | Permanent surface deformation | Coseismic uplift of 8 cm                                                                 | b | VIII-IX                                          | 27.26 |
| Eastern Samos   | <b>Posidonio</b><br>(southeastern part of Eastern Samos fault block)                   | Permanent surface deformation | Coseismic uplift of 13 cm                                                                | b | IX                                               | 31.99 |
| Eastern Samos   | <b>Psili Ammos</b><br>(southern part of Eastern Samos fault block)                     | Permanent surface deformation | Coseismic uplift of 15 cm                                                                | a | IX                                               | 29.64 |
| Eastern Samos   | <b>Pythagoreio – dock</b><br>(southern part of the eastern Samos fault block)          | Permanent surface deformation | Coseismic uplift of 20 cm                                                                | a | IX                                               | 27.93 |
| Eastern Samos   | <b>Pythagoreio – coastal rocks</b><br>(southern part of the eastern Samos fault block) | Permanent surface deformation | Coseismic uplift of 15-20 cm                                                             | a | IX                                               | 27.77 |
| Southern Samos  | <b>Sykia</b><br>(southern part of southern Samos fault block)                          | Permanent surface deformation | Coseismic uplift of 23 cm                                                                | b | IX                                               | 30.90 |
| Karlovasi Basin | <b>Ayios Nikolaos</b>                                                                  | Permanent surface deformation | Coseismic surface ruptures                                                               | a | VIII-IX                                          | 12.51 |

|                                                   |                                                                                           |                               |                            |               |                         |                                 |
|---------------------------------------------------|-------------------------------------------------------------------------------------------|-------------------------------|----------------------------|---------------|-------------------------|---------------------------------|
|                                                   | (northeastern part of Karlovasi Basin)                                                    |                               |                            |               |                         |                                 |
| Karlovasi Basin                                   | <b>Vrisses</b><br>(northeastern part of Karlovasi Basin)                                  | Permanent surface deformation | Coseismic surface ruptures | a             | VIII-IX                 | 14.26                           |
| Karlovasi Basin                                   | <b>Kontakaeika</b><br>(northeastern part of Karlovasi Basin)                              | Permanent surface deformation | Coseismic surface ruptures | a             | VIII-IX                 | 13.62                           |
| Karlovasi Basin                                   | <b>Ayios Elias</b><br>(northeastern part of Karlovasi Basin)                              | Permanent surface deformation | Coseismic surface ruptures | a             | VIII-IX                 | 14.26                           |
| Central Samos                                     | <b>Ampelos</b><br>(northern part of Central Samos)                                        | Permanent surface deformation | Coseismic surface ruptures | a             | VIII                    | 12.31                           |
| Central Samos                                     | <b>Ano Ayios Konstantinos</b><br>(northern part of Central Samos)                         | Permanent surface deformation | Coseismic surface ruptures | a             | VIII                    | 12.11                           |
| <b>SECONDARY EARTHQUAKE ENVIRONMENTAL EFFECTS</b> |                                                                                           |                               |                            |               |                         |                                 |
| <b>Fault Block affected by EEE</b>                | <b>Area affected by EEE</b>                                                               | <b>Type of EEE</b>            | <b>Description of EEE</b>  | <b>Source</b> | <b>ESI-07 intensity</b> | <b>Epicentral distance (km)</b> |
| Western Samos                                     | <b>Potami coastal area – 1st site</b><br>(northwestern part of western Samos fault block) | Slope failures                | Rockfalls                  | a             | V                       | 18.13                           |
| Western Samos                                     | <b>Potami coastal area – 2nd site</b><br>(northwestern part of western Samos fault block) | Slope failures                | Rockfalls                  | a             | V                       | 18.81                           |
| Karlovasi Basin                                   | <b>Koumaeika village</b><br>(southeastern part of Karlovasi Basin)                        | Slope failures                | Rockfalls                  | a             | VI                      | 23.36                           |
| Central Samos                                     | <b>Ampelos – Stavrinides area</b><br>(northern part of Central Samos)                     | Slope failures                | Rockfalls                  | a             | VI                      | 13.34                           |
| Mytilinii Basin                                   | <b>Kedros</b><br>(northeastern part of Mytilinii Basin)                                   | Slope failures                | Rockfalls                  | a             | IV                      | 18.81                           |

|                 |                                                                      |                |                                                                  |   |      |       |
|-----------------|----------------------------------------------------------------------|----------------|------------------------------------------------------------------|---|------|-------|
| Mytilinii Basin | <b>Kokkari area</b><br>(northeastern part of Mytilinii Basin)        | Slope failures | Rockfalls along an artificial road slope from Vathy to Avlakia   | a | IV-V | 17.81 |
| Mytilinii Basin | <b>Kokkari bay</b><br>(northeastern part of Mytilinii Basin)         | Slope failures | Rockfalls in Kokkari islet                                       | a | V    | 17.16 |
| Mytilinii Basin | <b>Kokkari bay</b><br>(northeastern part of Mytilinii Basin)         | Slope failures | Rockfalls in Kokkari peninsula                                   | a | V    | 16.72 |
| Mytilinii Basin | <b>Kokkari bay</b><br>(northeastern part of Mytilinii Basin)         | Slope failures | Rockfalls in Kokkari town                                        | a | V    | 17.10 |
| Mytilinii Basin | <b>Lemonakia</b><br>(northeastern part of Mytilinii Basin)           | Slope failures | Landslide along a road slope                                     | a | IV   | 15.97 |
| Mytilinii Basin | <b>Avlakia</b><br>(northeastern part of Mytilinii Basin)             | Slope failures | Rockfalls and landslides along a road slope                      | a | VIII | 13.86 |
| Mytilinii Basin | <b>Tsambou beach</b><br>(northeastern part of Mytilinii Basin)       | Slope failures | Rockfalls along the coastal slope                                | a | VI   | 13.23 |
| Mytilinii Basin | <b>Remataki</b><br>(southern part of Mytilinii Basin)                | Slope failures | Rockfalls along a slope in an unstable zone with recent failures | a | VII  | 27.72 |
| Mytilinii Basin | <b>Marina of Samos</b><br>(southern part of Mytilinii Basin)         | Slope failures | Rockfalls                                                        | a | IV-V | 28.06 |
| Eastern Samos   | <b>Psili Ammos</b><br>(southern part of Eastern Samos fault block)   | Slope failures | Rockfalls                                                        | a | IV-V | 30.47 |
| Central Samos   | <b>Platanos</b><br>(southern part of Central Samos fault block)      | Slope failures | Rockfalls along a road slope                                     | a | IV   | 21.98 |
| Southern Samos  | <b>Tsopela Cape</b><br>(southern part of Southern Samos fault block) | Slope failures | Rockfalls along a coastal slope                                  | a | VI   | 30.83 |

|                 |                                                                  |                        |                                                                                                                                               |   |        |       |
|-----------------|------------------------------------------------------------------|------------------------|-----------------------------------------------------------------------------------------------------------------------------------------------|---|--------|-------|
| Mytilinii Basin | <b>Malagari</b><br>(northeastern part of Mytilinii Basin)        | Liquefaction phenomena | Ejection of liquefied material along cracks in Malagari port                                                                                  | a | VI     | 22.65 |
| Mytilinii Basin | <b>Maounes beach</b><br>(northeastern part of Mytilinii Basin)   | Liquefaction phenomena | Ejection of liquefied material along cracks, sand boils, lateral spreading in Maounes beach                                                   | a | VIII   | 22.11 |
| Central Samos   | <b>Petalides</b><br>(northern part of Central Samos fault block) | Ground cracks          | Ground cracks in Petalides coastal road                                                                                                       | a | VI-VII | 11.60 |
| Mytilinii Basin | <b>Malagari</b><br>(northeastern part of Mytilinii Basin)        | Ground cracks          | Ground cracks in Malagari coastal road                                                                                                        | a | VI-VII | 22.80 |
| Central Samos   | <b>Ampelos</b><br>(northern part of Central Samos fault block)   | Hydrological anomalies | Increased water discharge                                                                                                                     | a | VI     | 12.43 |
| Mytilinii Basin | <b>Kazania</b><br>(central part of Mytilinii Basin)              | Hydrological anomalies | Reappearance of springs and increased water discharge                                                                                         | a | VII    | 22.08 |
| Western Samos   | <b>Kiourka</b><br>(southern part of Western Samos fault block)   | Hydrological anomalies | Reappearance of springs                                                                                                                       | a | VII    | 24.16 |
| Eastern Samos   | <b>Coastal Vathy town</b><br>(Southeastern coast of Vathy Bay)   | Tsunami                | Run up ranging from 1.15 to 2.0 m, run-in ranging from 35 to 102 m, maximum run up 2.0 m at maximum run in distance of 102 m, material damage | c | VIII   | 23.19 |
| Eastern Samos   | <b>Gagou beach</b><br>(Northeastern coast of Vathy Bay)          | Tsunami                | Maximum run up of 0.4 m, maximum run-in distance of 7.0 m                                                                                     | c | VI     | 27.74 |
| Eastern Samos   | <b>Malagari beach</b>                                            | Tsunami                | Tsunami run up of ~1.25 m at a run-in distance                                                                                                | c | VII    | 22.23 |

|                 |                                                                                |         |                                                                                                                                                   |   |      |       |
|-----------------|--------------------------------------------------------------------------------|---------|---------------------------------------------------------------------------------------------------------------------------------------------------|---|------|-------|
|                 | (Southwestern coast of Vathy Bay)                                              |         | of ~20 cm, objects moved away and rotated, vessels drifted away or lost in the sea                                                                |   |      |       |
| Mytilinii Basin | <b>Kedros beach</b><br>(western coast of Vathy Bay)                            | Tsunami | Run-up of ~0.8 m at run-in distance of ~5 m, no material damage                                                                                   | c | VI   | 19.18 |
| Mytilinii Basin | <b>Kokkari beach</b><br>(northeastern part of Mytilinii Basin)                 | Tsunami | Sea level rise of ~1.0 m and water whirlpools                                                                                                     | c | VI   | 17.16 |
| Karlovasi basin | <b>Karlovasi vessel shelter area</b><br>(northwestern part of Karlovasi Basin) | Tsunami | Tsunami run-up $\geq 0.7$ m at run-in distance $\geq 84$ m, light wooden structures and objects displaced, boats moved ashore and fences deformed | c | VII  | 16.71 |
| Karlovasi basin | <b>Karlovasi port</b><br>(northwestern part of Karlovasi Basin)                | Tsunami | Tsunami run-up of 0.7 m at run-in distance of 53 m, material damage in stores                                                                     | c | VII  | 16.99 |
| Karlovasi basin | <b>Ayios Nikolaos beach</b><br>(northeastern part of Karlovasi basin)          | Tsunami | Tsunami run-up of 3.55 m                                                                                                                          | c | VIII | 12.53 |
| Eastern Samos   | <b>Psili Ammos bay</b><br>(southern part of Eastern Samos fault block)         | Tsunami | Tsunami run-up $< 0.5$ m                                                                                                                          | c | VI   | 29.57 |
| Mytilinii Basin | <b>Pythagoreio town, port</b><br>(southeastern part of Mytilinii Basin)        | Tsunami | Tsunami run-up $< 0.5$ m                                                                                                                          | c | VI   | 27.75 |
| Southern Samos  | <b>Heraion beach</b><br>(eastern part of Southern Samos fault block)           | Tsunami | Tsunami run-up of 0.4 m                                                                                                                           | c | VI   | 28.45 |

|               |                                                                     |         |                                               |   |    |       |
|---------------|---------------------------------------------------------------------|---------|-----------------------------------------------|---|----|-------|
| Western Samos | <b>Kampos beach</b><br>(southern part of Western Samos fault block) | Tsunami | sea level drop by 0.3 m and rise by 0.2-0.3 m | c | VI | 24.55 |
|---------------|---------------------------------------------------------------------|---------|-----------------------------------------------|---|----|-------|
